# Supplementary material for: Relationship between Middle Cerebral Artery Pulsatility Index and Delayed Neurocognitive Recovery in Patients undergoing Robot-Assisted Laparoscopic Prostatectomy
Source: MDPI journal article supplement (doi:10.3390/jcm12031070), 2023-01-30

**Table S1.** ANOVAs Group (dNCR vs No dNCR) × Time (T0 vs T1) on each item of SF-36 (n=60). T0= Before surgery; T1= After surgery (2nd day postoperatively). Values are shown as mean (M) ± standard deviation (SD).

| Item                                          | Patients with dNCR<br>(N=20) |                | Patients without dNCR<br>(N=40) |                | GroupF (1,58)<br>Time F (1,58)<br>Group × Time F (1,58)                      | Post-hoc                                                      |
|-----------------------------------------------|------------------------------|----------------|---------------------------------|----------------|------------------------------------------------------------------------------|---------------------------------------------------------------|
|                                               | (T0)<br>M ± SD               | (T1)<br>M ± SD | (T0)<br>M ± SD                  | (T1)<br>M ± SD |                                                                              |                                                               |
| Physical functioning                          | 78.2 ± 20.7                  | 68.2 ± 30.3    | 84.1 ± 17.5                     | 70.0 ± 32.1    | Group: 0.39; p= .534<br>Time: 11.17; p= .001<br>Group × Time: 0.32; p= .569  | ---                                                           |
| Limitations of role due to physical problems  | 60.0 ± 36.3                  | 50.0 ± 45.2    | 63.7 ± 35.3                     | 48.1 ± 38.1    | Group: 0.01; p= .919<br>Time: 6.87; p= .011<br>Group × Time: 0.33; p= .567   | ---                                                           |
| Limitations of role due to emotional problems | 76.6 ± 36.0                  | 56.7 ± 40.6    | 75. ± 31.8                      | 57.5 ± 38.5    | Group: 0.01; p= .961<br>Time: 13.08; p < .01<br>Group × Time: 0.05; p= .811  | ---                                                           |
| Energy-Fatigue                                | 68.2 ± 15.1                  | 56.5 ± 23.0    | 64.2 ± 14.9                     | 61.3 ± 11.3    | Group: 0.01; p= .907<br>Time: 12.81; p < .001<br>Group × Time: 4.71; p= .033 | dNCR T1 < dNCR T0; p= .0008                                   |
| Emotional well-being                          | 70.2 ± 14.5                  | 59.2 ± 21.1    | 69.3 ± 13.9                     | 68.3 ± 12.3    | Group: 1.18; p= .28<br>Time: 14.12; p < .001<br>Group × Time: 9.98; p= .002  | dNCR T1 < No dNCR T1; p= .028<br>dNCR T1 < dNCR T0; p < .0001 |
| Social functioning                            | 75.0 ± 20.3                  | 63.7 ± 25.9    | 76.2 ± 18.3                     | 71.6 ± 18.5    | Group: 0.91; p= .342<br>Time: 7.89; p= .006<br>Group × Time: 1.33; p= .025   | ---                                                           |
| Pain                                          | 79.7 ± 23.6                  | 49.5 ± 22.3    | 82.5 ± 19.3                     | 61.9 ± 20.0    | Group: 2.69; p= .106<br>Time: 58.12; p < .001<br>Group × Time: 2.11; p= .151 | ---                                                           |
| General health perception                     | 54.7 ± 16.2                  | 52.5 ± 15.6    | 57.6 ± 15.3                     | 56.7 ± 62.6    | Group: 0.88; p= .35<br>Time: 0.82; p= .367<br>Group × Time: 0.12; p= .727    | ---                                                           |
| Change in health status                       | 37.5 ± 17.2                  | 42.5 ± 28.2    | 43.1 ± 21.1                     | 39.3 ± 20.3    | Group: 0.02 p= .781<br>Time: 0.02; p= .872<br>Group × Time: 1.27; p= .263    | ---                                                           |

**Figure S1.** Numerical rate scale (NRS) for pain in patients with dNCR (red line) versus patients without dNCR (blu line) at the following times: at patient's arrival in the recovery room (RR), after 1, 2, 8, 12, 24 and 48 hours. Values are shown as mean  $\pm$  95% confidence interval. Interaction F (Group *per* Time) is shown. dNCR, delayed neurocognitive recovery.

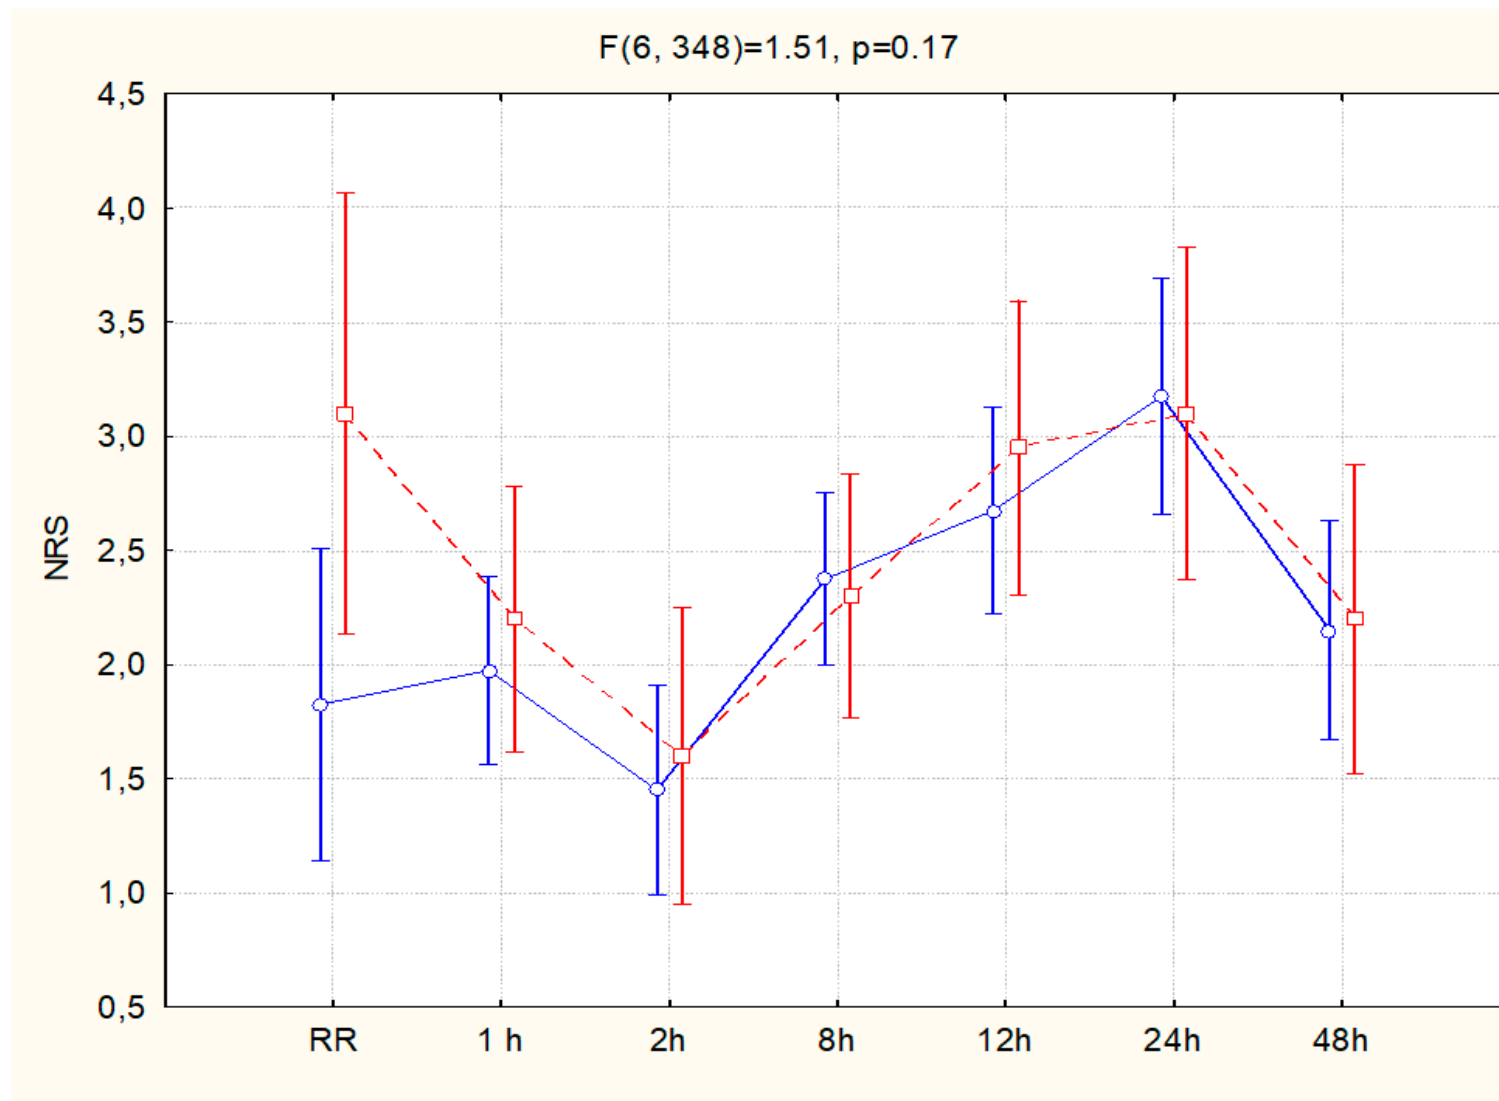

**Figure S2.** Mean arterial pressure (MAP) in patients with dNCR (red line) versus patients without dNCR (blue line) at the following times: before (T1) and after (T2) the induction of anesthesia; 30 minutes (T3) and one hour after the start of ST combined with pneumoperitoneum (T4); before ST and pneumoperitoneum removal (T5); ten minutes after the end of ST and pneumoperitoneum before waking up (T6). Values are shown as mean  $\pm$  95% confidence interval. Interaction F (Group *per* Time) is shown. dNCR, delayed neurocognitive recovery. ST, Steep Trendelenburg.

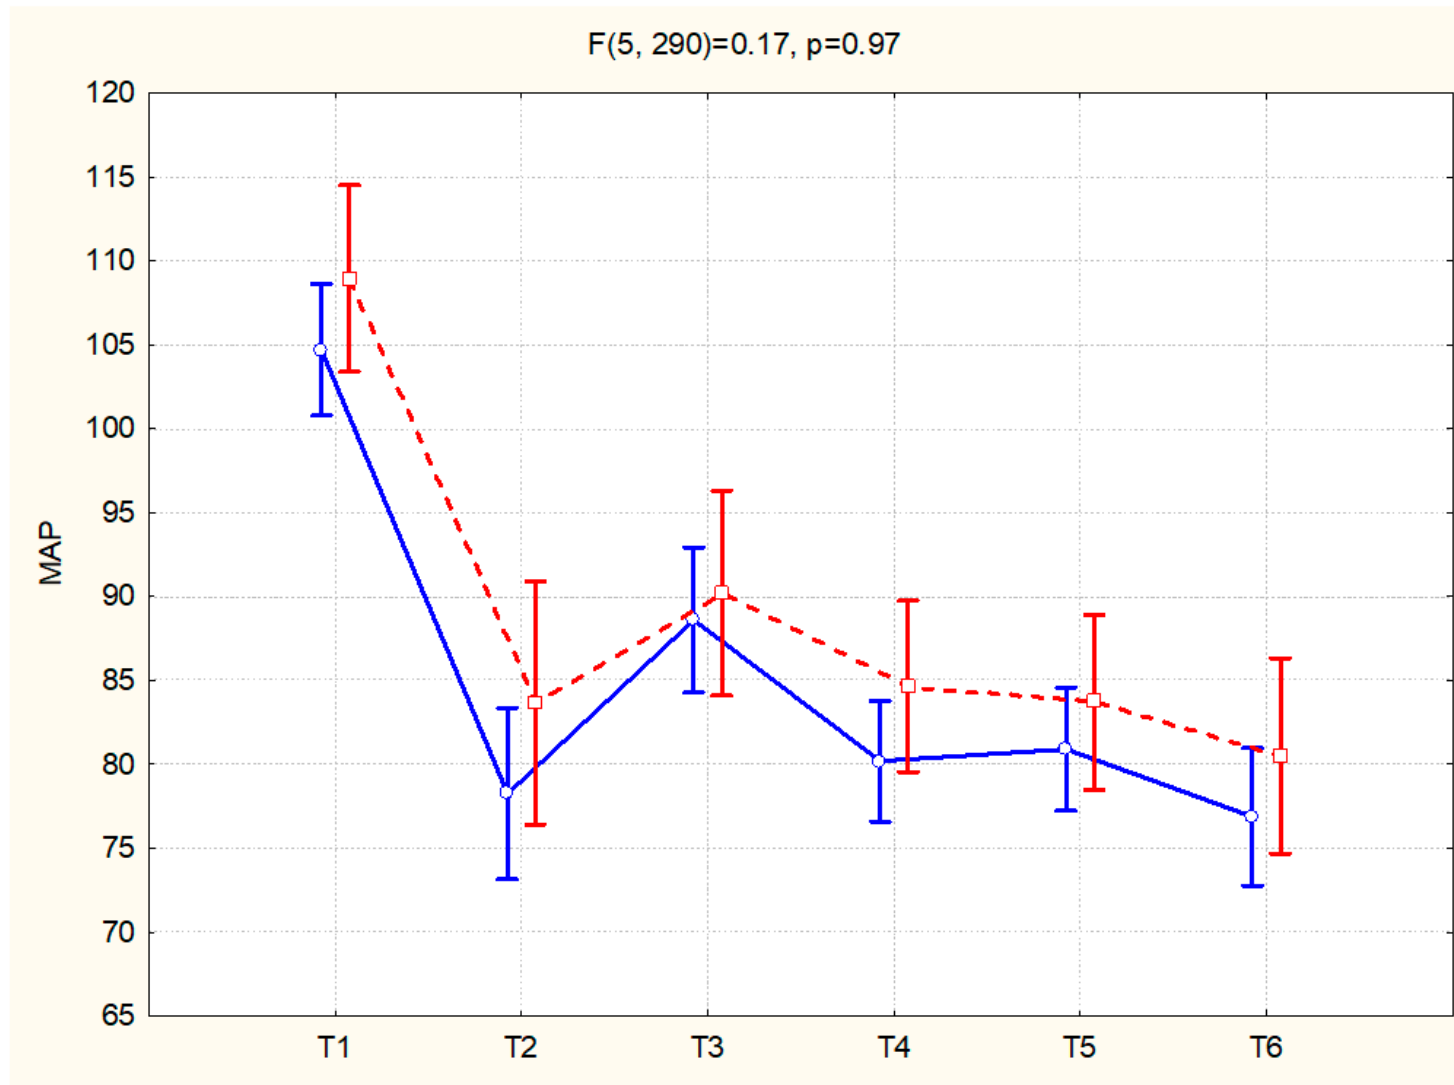

**Figure S3.** Heart rate in patients with dNCR (red line) versus patients without dNCR (blu line) at the following times: before (T1) and after (T2) the induction of anesthesia; 30 minutes (T3) and one hour after the start of ST combined with pneumoperitoneum (T4); before ST and pneumoperitoneum removal (T5); ten minutes after the end of ST and pneumoperitoneum before waking up (T6). Values are shown as mean  $\pm$  95% confidence interval. Interaction F (Group *per* Time) is shown. dNCR, delayed neurocognitive recovery. ST, Steep Trendelenburg.

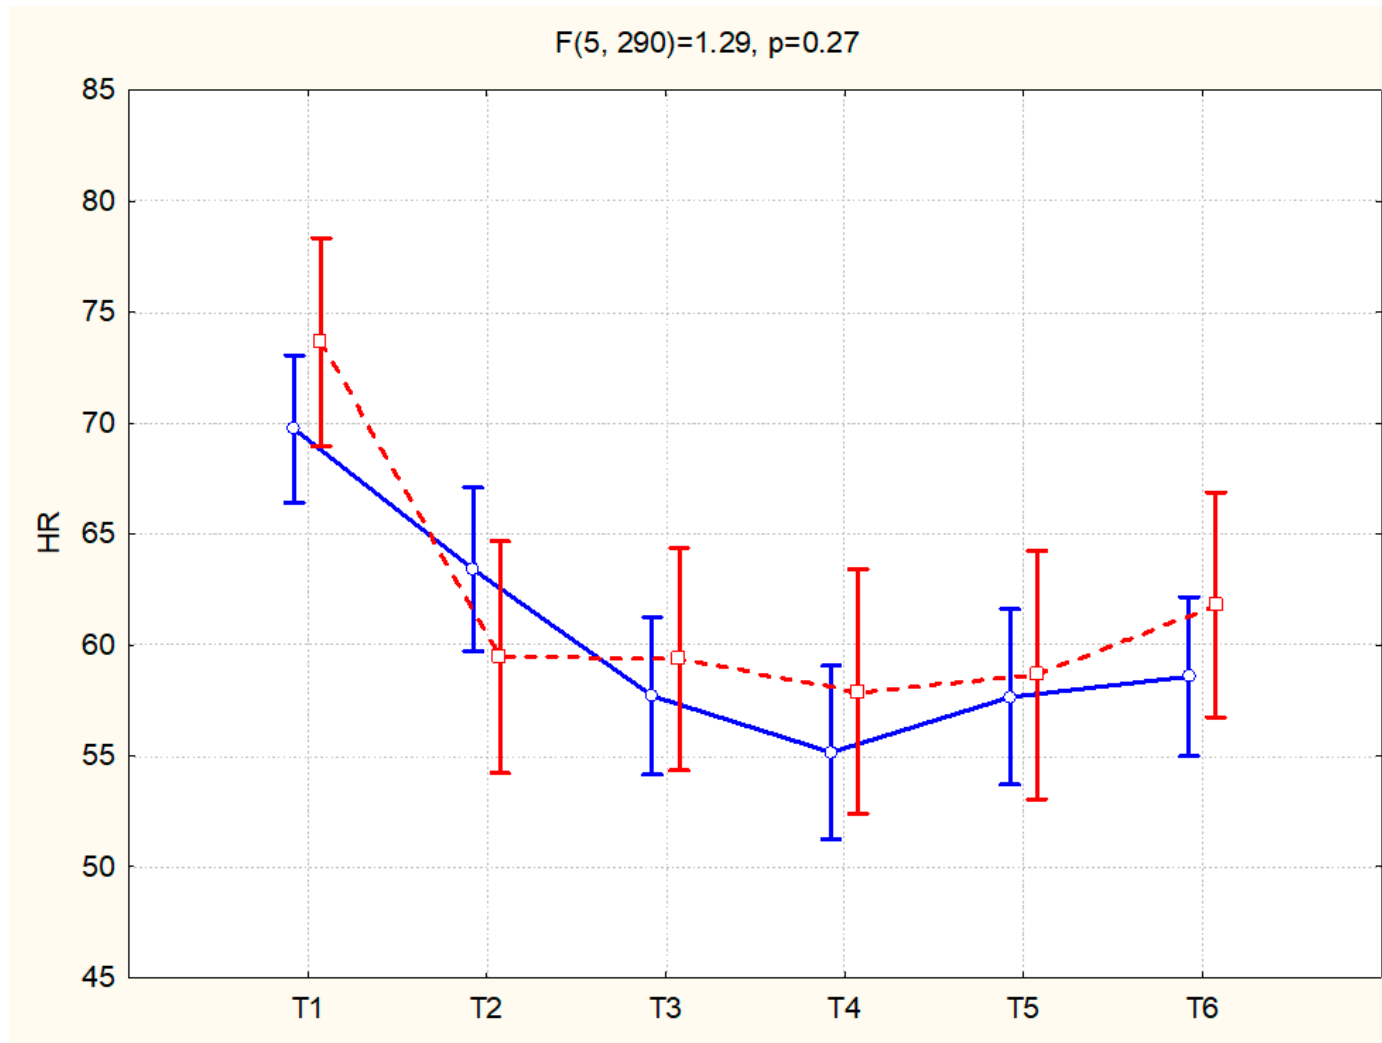

**Figure S4.** End tidal CO<sub>2</sub> (mmHg) values in patients with dNCR (red line) versus patients without dNCR (blue line) at the following times: after the induction of anesthesia (T2); 30 minutes (T3) and one hour after the start of ST combined with pneumoperitoneum (T4); before ST and pneumoperitoneum removal (T5); ten minutes after the end of ST and pneumoperitoneum before waking up (T6). Values are shown as mean  $\pm$  95% confidence interval. Interaction F (Group *per* Time) is shown. dNCR, delayed neurocognitive recovery. ST, Steep Trendelenburg.

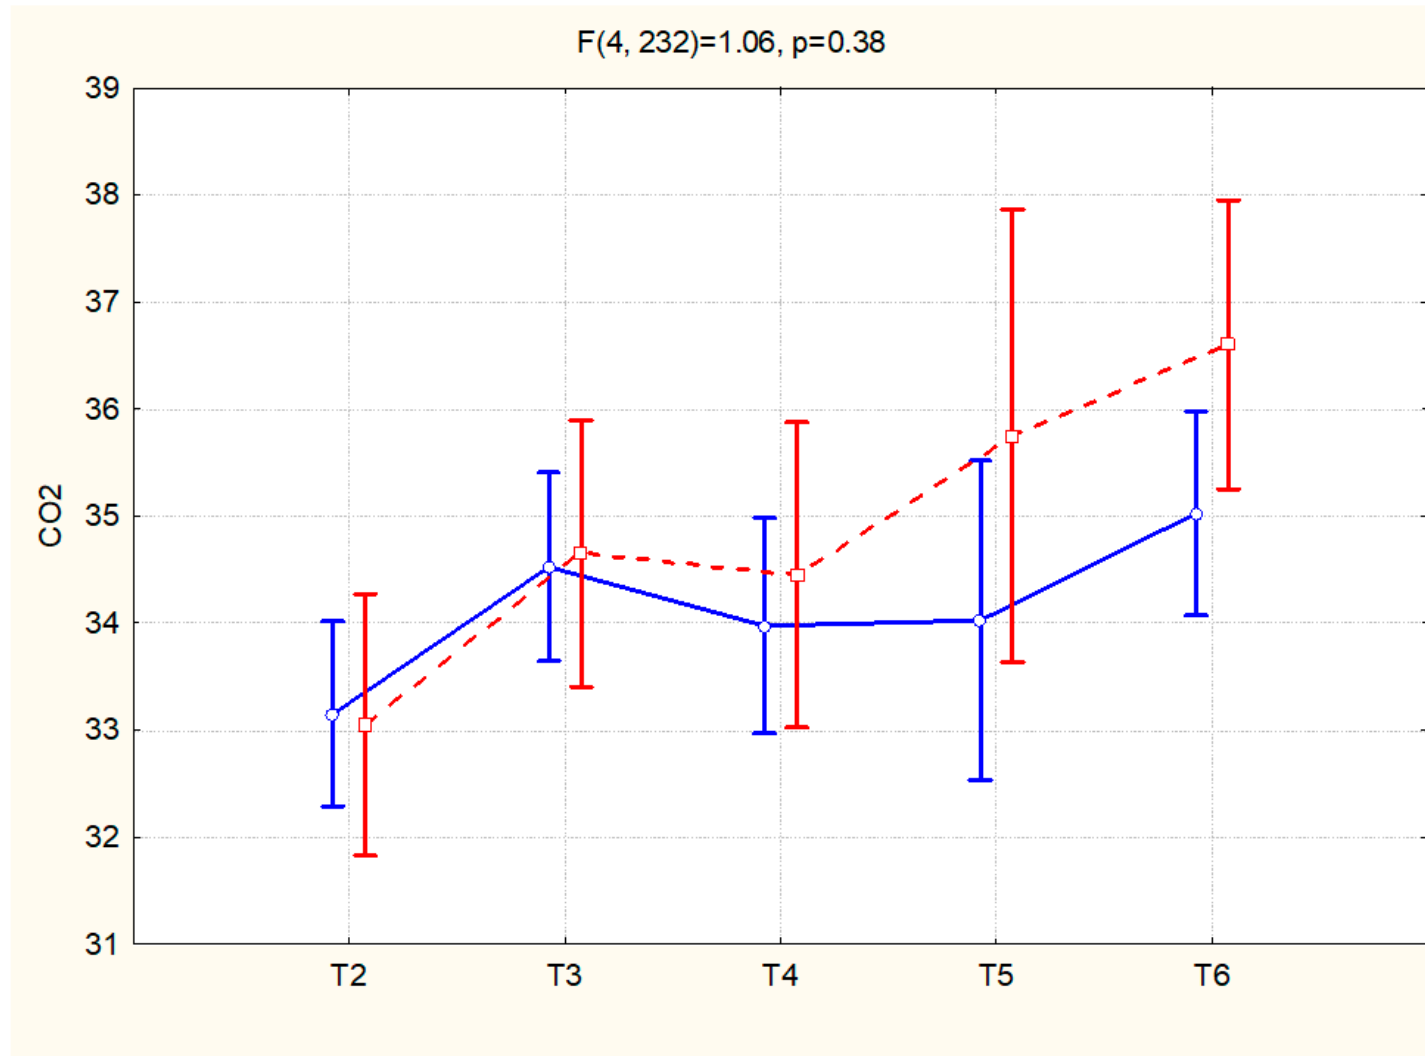

**Figure S5.** Bispectral index (BIS) in patients with dNCR (red line) versus patients without dNCR (blue line) at the following times: before (T1) and after (T2) the induction of anesthesia; 30 minutes (T3) and one hour after the start of ST combined with pneumoperitoneum (T4); before ST and pneumoperitoneum removal (T5); ten minutes after the end of ST and pneumoperitoneum before waking up (T6). Values are shown as mean  $\pm$  95% confidence interval. Interaction F (Group *per* Time) is shown. dNCR, delayed neurocognitive recovery. ST, Steep Trendelenburg.

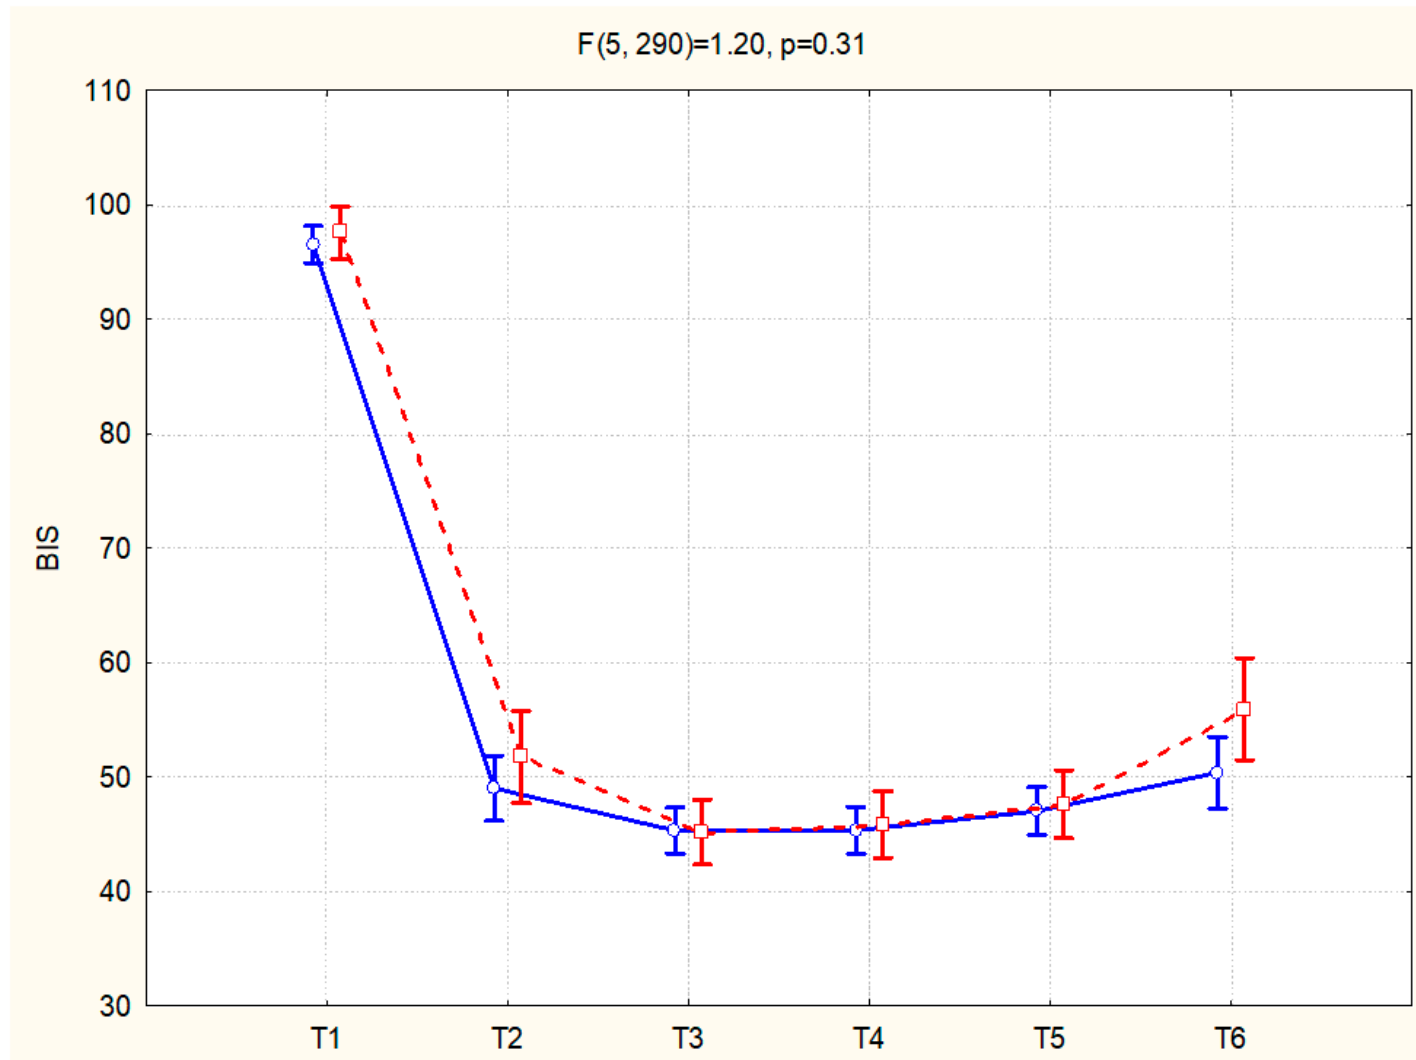

**Figure S6.** Pneumoperitoneum pressure (mmHg) in patients with dNCR (red line) versus patients without dNCR (blue line) at the following times: 30 minutes (T3) and one hour after the start of ST combined with pneumoperitoneum (T4); before ST and pneumoperitoneum removal (T5). Values are shown as mean  $\pm$  95% confidence interval. Interaction F (Group *per* Time) is shown. dNCR, delayed neurocognitive recovery. ST, Steep Trendelenburg.

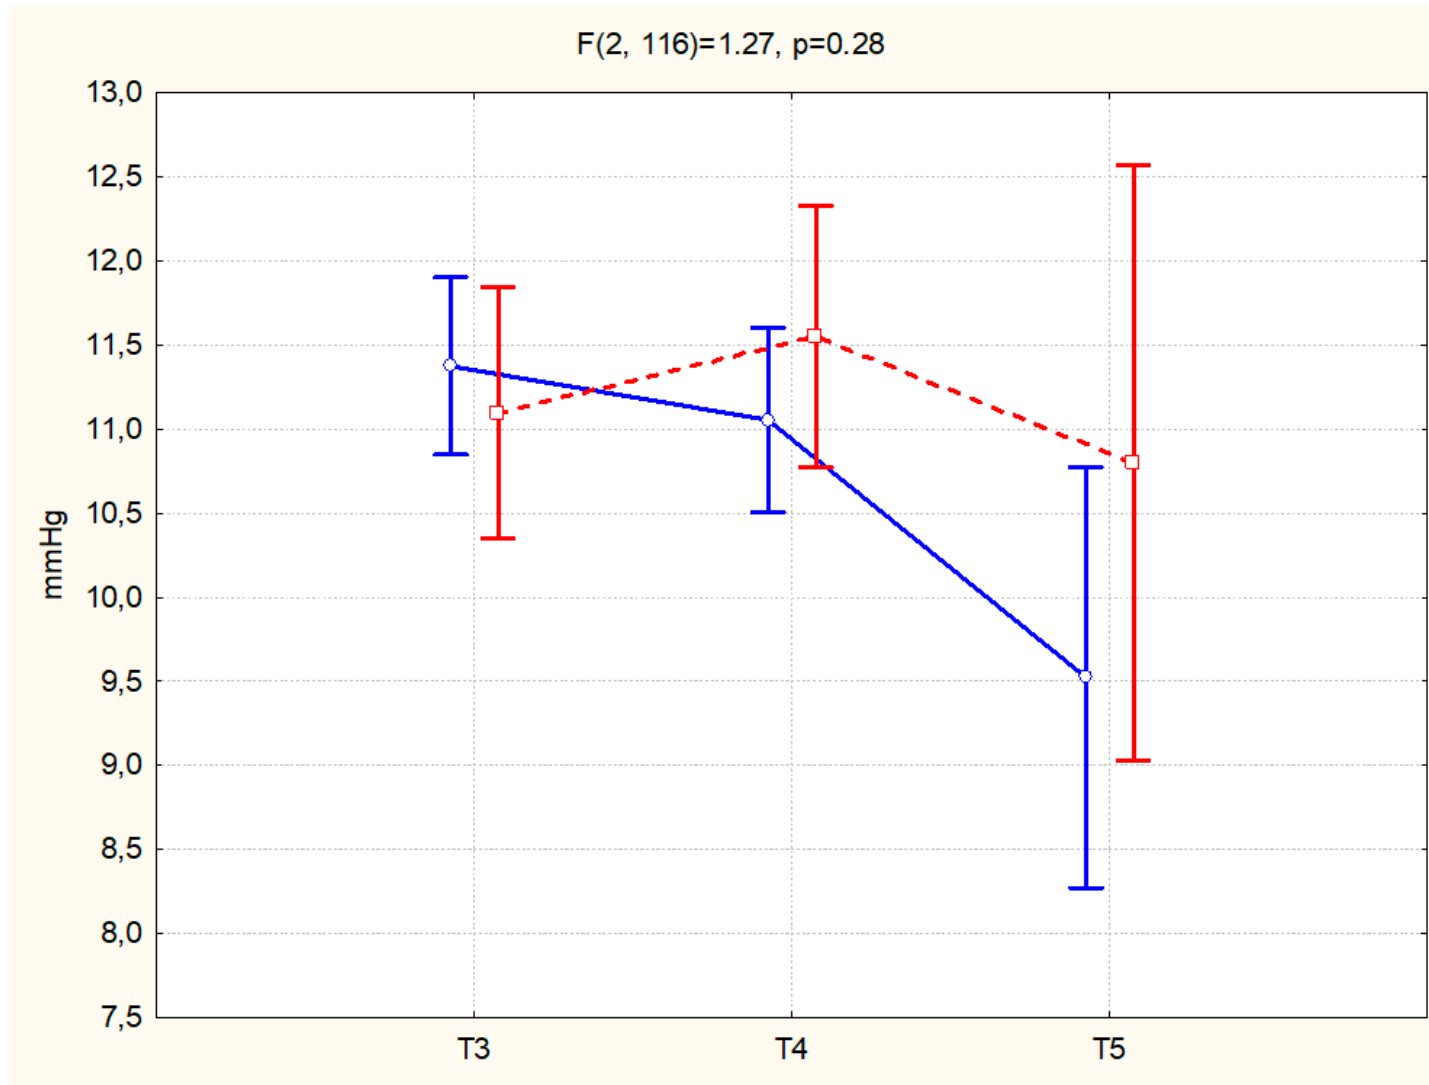

**Figure S7.** Resistivity index in patients with dNCR (red line) versus patients without dNCR (blue line) at the following times: before (T1) and after (T2) the induction of anesthesia; 30 minutes (T3) and one hour after the start of ST combined with pneumoperitoneum (T4); before ST and pneumoperitoneum removal (T5); ten minutes after the end of ST and pneumoperitoneum before waking up (T6). Values are shown as mean  $\pm$  95% confidence interval. Interaction F (Group *per* Time) is shown. dNCR, delayed neurocognitive recovery. ST, Steep Trendelenburg.

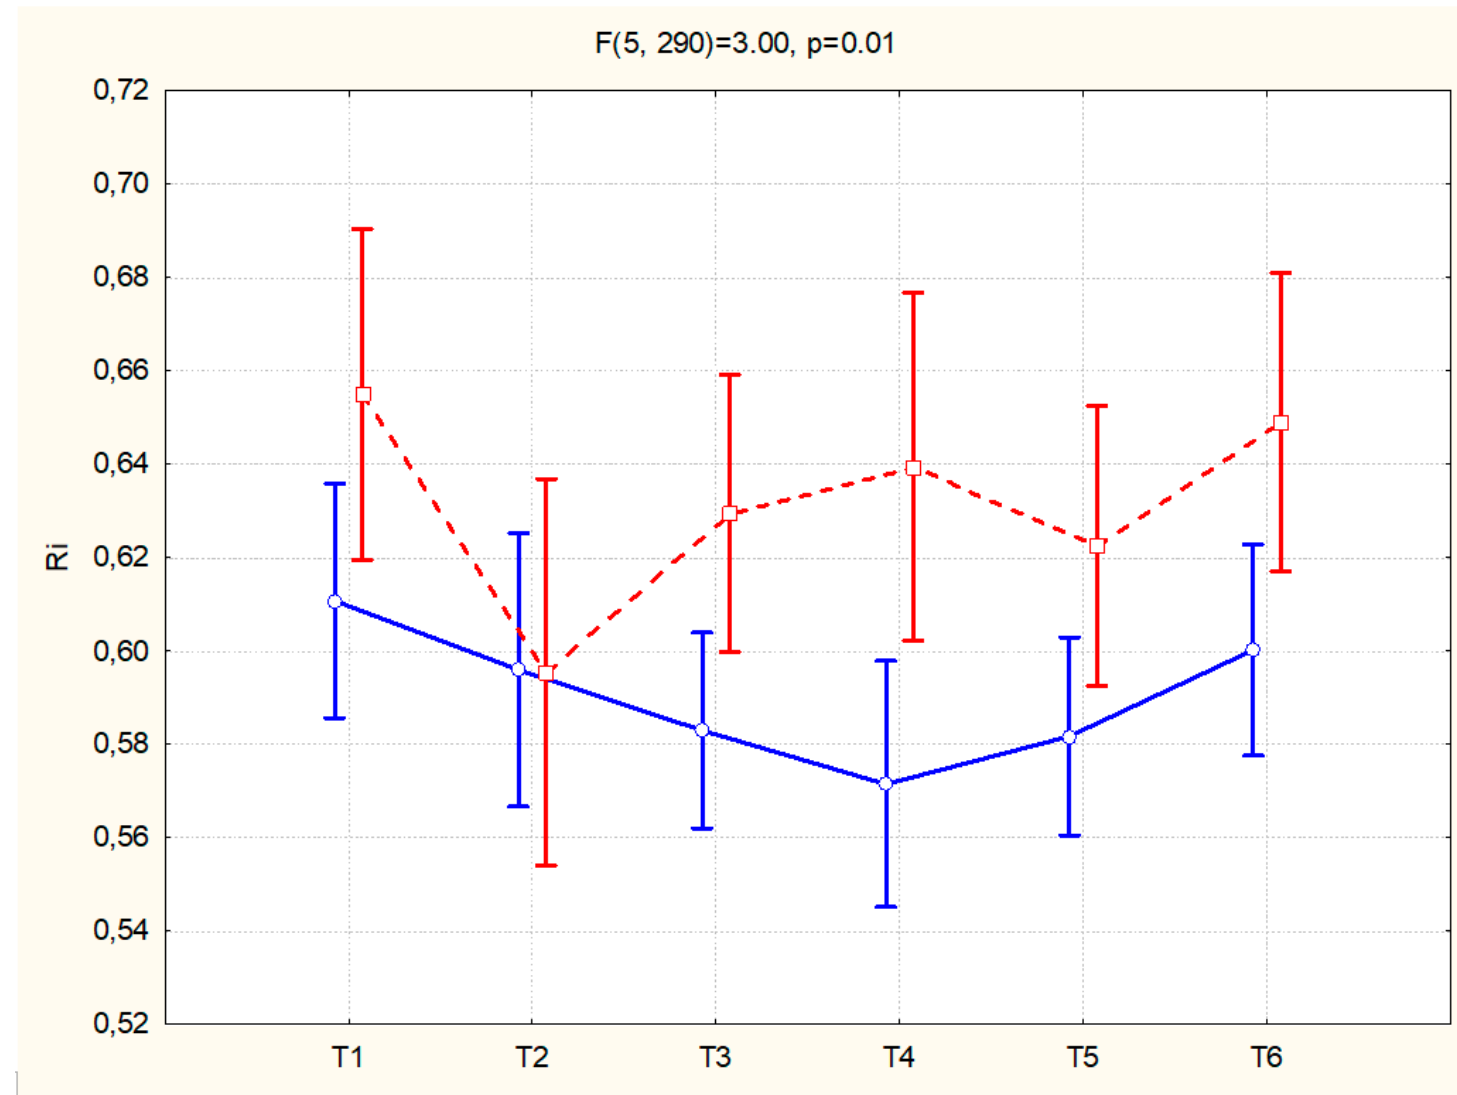

Supplement: s1 [file s1]
